# Supplementary material
Source: PubMed Central journal article supplement (PMC4478034)
Supplement: supp_WNL.0000000000001678_Figure_e-1.pdf [file supp_WNL.0000000000001678_Figure_e-1.pdf]

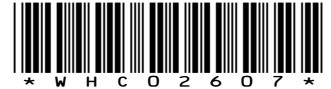

### Code One MRI Safety Questionnaire

Fill out the form completely and bring to MRI with the patient.  
Failure to properly fill out this safety questionnaire can delay the patient's examination.

**The following devices are contraindicated for imaging with MRI — Proceed to CT**

If known, does the patient have any of the following? (Please check appropriate box — Yes or No)

- Pacemaker  Yes  No
- Defibrillator  Yes  No
- Aneurysm clip  Yes  No
- Cochlear implant  Yes  No
- Orbital foreign bodies  Yes  No

**The patient has no contraindicated implants:**

- Per Radiologist radiograph interpretation
- Per NIH Stroke Team physician radiograph interpretation

**The following require consideration prior to imaging with MRI**

If known, does the patient have any of the following? (Please check appropriate box—Yes or No)

- Swan-Ganz catheter\*  Yes\*  No
- Medication patch\*  Yes\*  No
- Spinal cord stimulator\*\*  Yes\*\*  No
- Neurostimulation system\*\*  Yes\*\*  No
- Insulin or other infusion pump\*\*  Yes\*\*  No
- Pregnant  Yes  No
- Other metallic implant or device  Yes\*\*\*  No

\*\*\*If Yes, Specify:

\*Remove medication patches and Swan-Ganz catheters prior to imaging

\*\*The Stroke Team physician will make the determination if and where the patient will be imaged

**Comments:**

**Confirmation by person completing this form:**

\_\_\_\_\_  
Signature Date Time

\_\_\_\_\_  
Print Name

**Form information reviewed by:**

\_\_\_\_\_  
Signature Date Time

\_\_\_\_\_  
Print Name
