# Supplementary material
Source: PubMed Central journal article supplement (PMC4478034)
Supplement: supp_WNL.0000000000001678_Figure_e-2.pdf [file supp_WNL.0000000000001678_Figure_e-2.pdf]

**Figure e-2: Door to Needle Processes at SH**

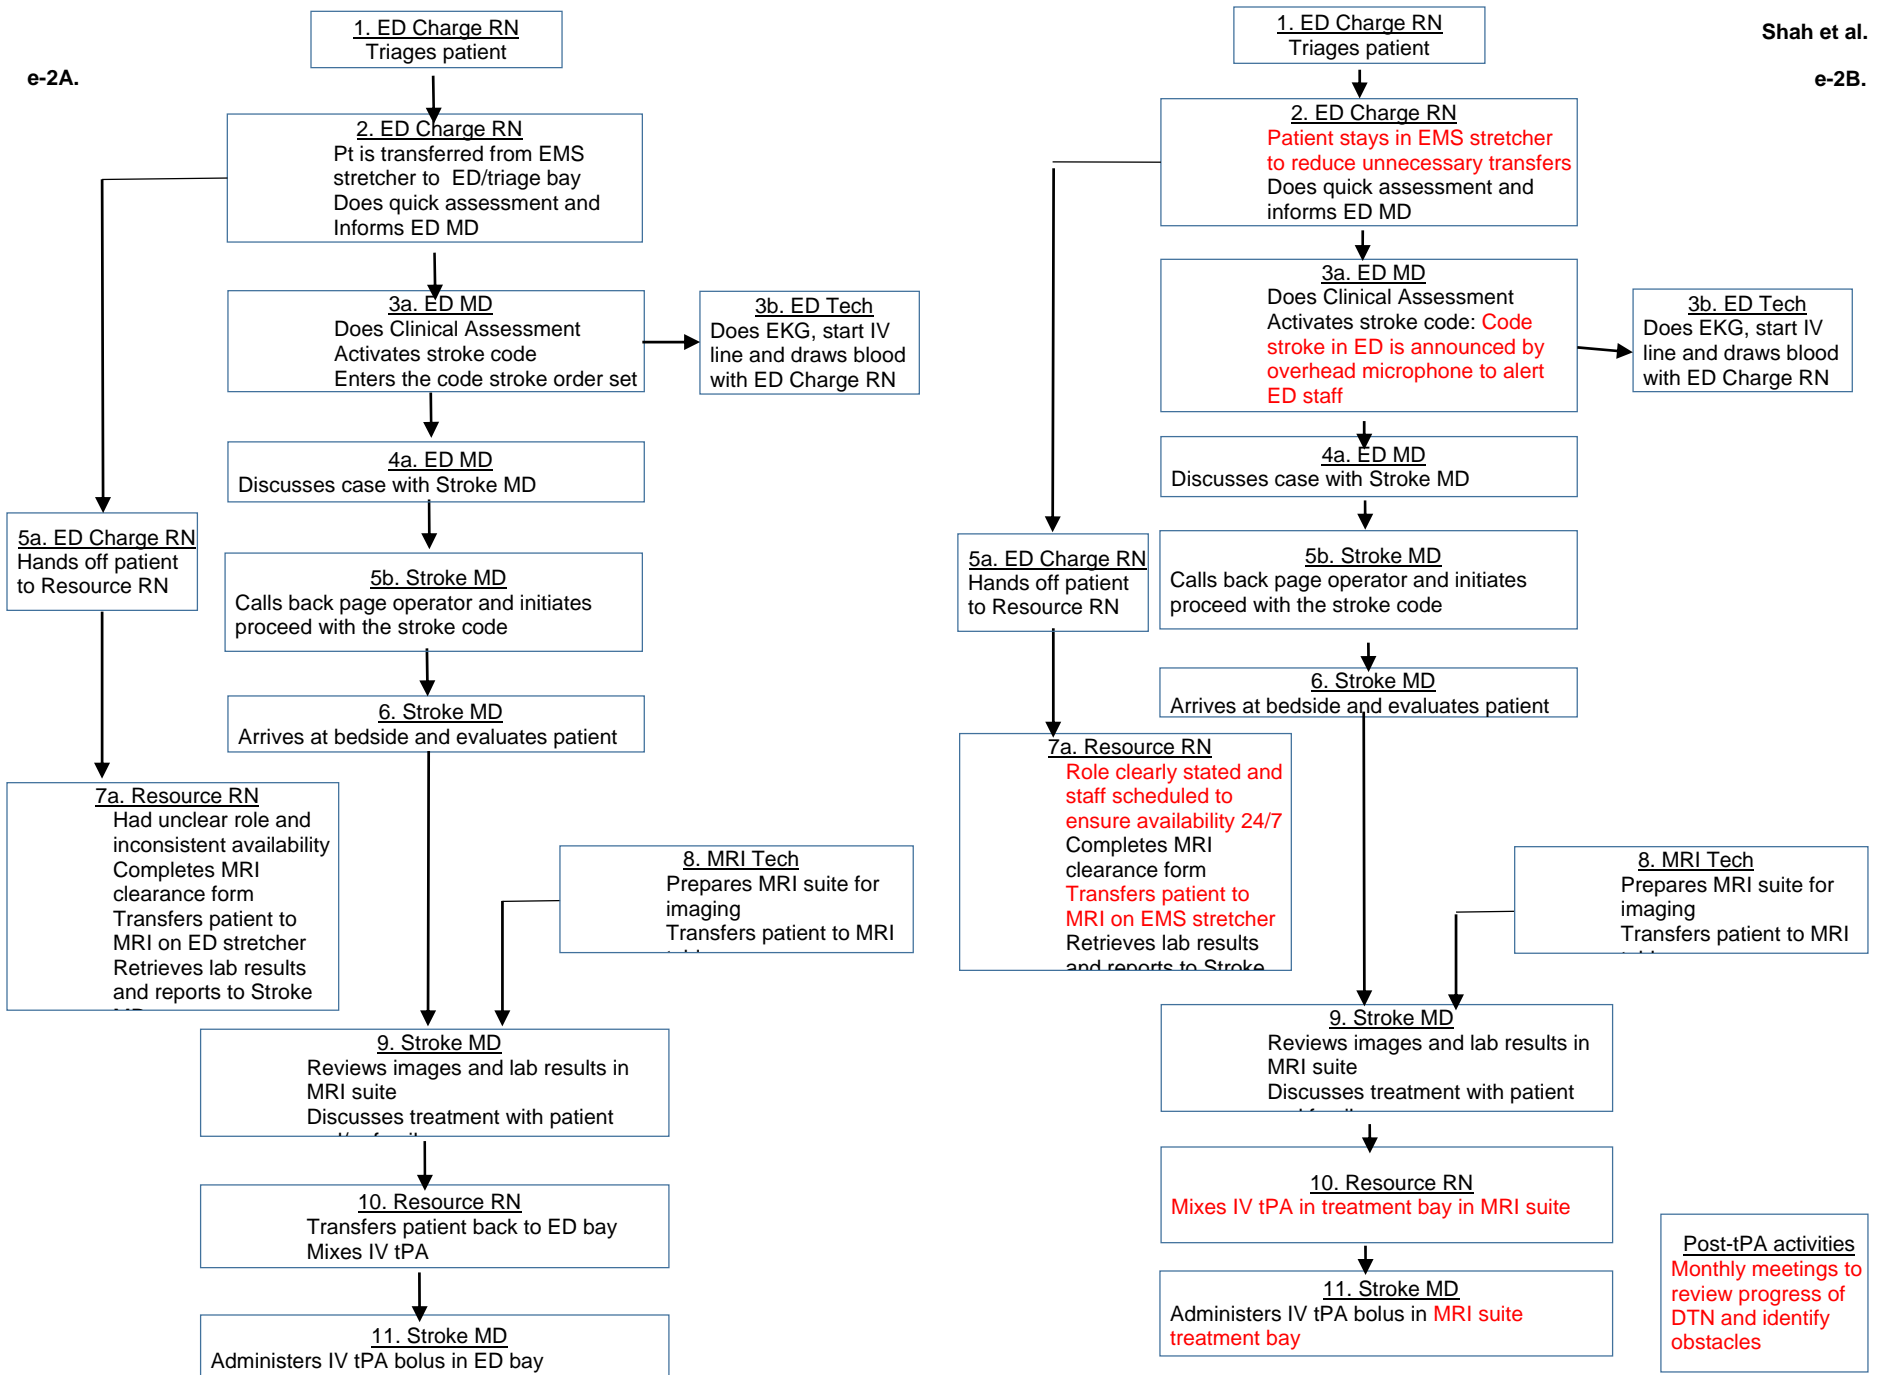

Legend: e- 2A. Pre-SMART Door to Needle Process at SH e-2B. Post-SMART Door to Needle Process at SH. Key differences between two are highlighted in red color.
